# Supplementary material
Source: PubMed Central journal article supplement (PMC4248698)
Supplement: EC.00161-14_zek999094352so1.pdf [file EC.00161-14_zek999094352so1.pdf]

Figure S1

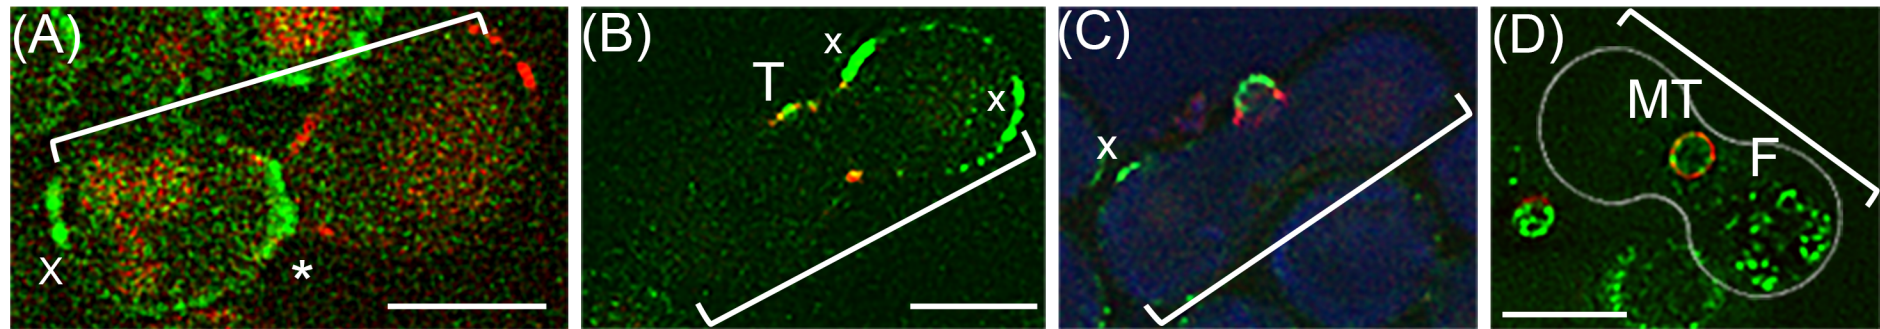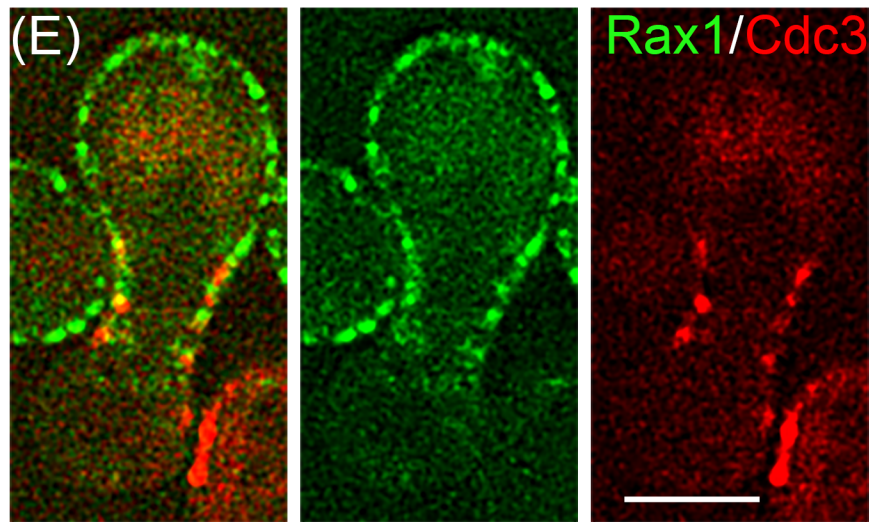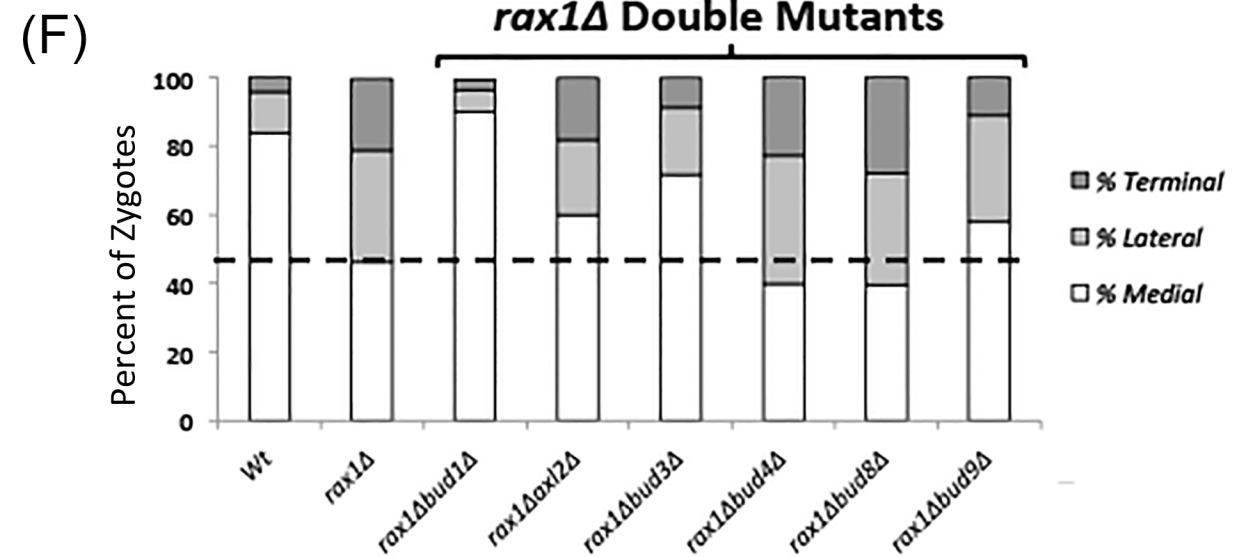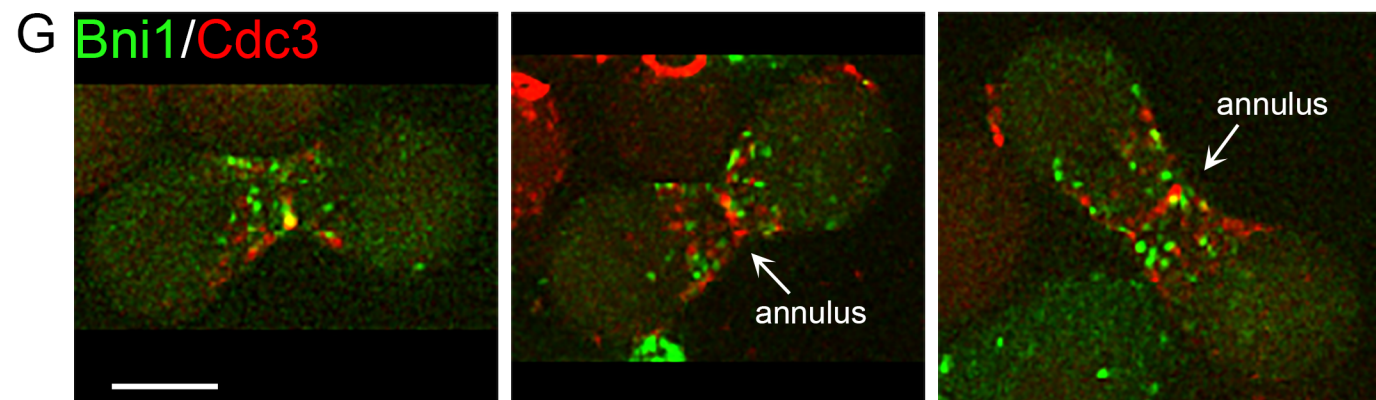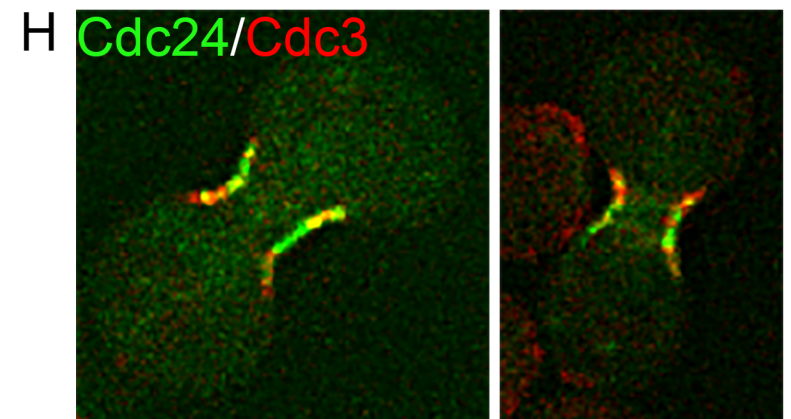

**Figure S1. Rax1 and Other Polarity Specifying Proteins** (related to Figure 1)

For A-E, a cell expressing functional GFP-Rax1 was crossed with a cell expressing the tagged septin, Cdc3-mCherry. The brackets designate the position of the zygotes.

**A. Localization of GFP-Rax1 to the Zone of Contact (ZOC).** Before cell fusion, GFP-Rax1 concentrates at the ZOC (\*) and is also present as seemingly rough patches (x) which likely are sites of previous cytokinesis (Fujita et al., 2004).

**B. Localization just before triad formation.** Triad formation (T) is visible and two rough patches (x) persist.

**C. Localization to the triad.** With time, the triad (T) becomes more visible.

**D. Supramolecular structure at the cortex.** In face views, the rough patches often have a “floret”-like substructure (F). This same zygote is producing a medial bud (MT) which expresses GFP-Rax1 and is encircled by Cdc3-mCherry (constituting a triad).  
Strains: ATY4774 x ATY5562.

**E. Limited diffusion of GFP-Rax1.** The three images illustrate an intermediate time point equivalent to Figure 2E (“intermixed”). Note that GFP-Rax1 - that initially rims much of the upper parental cortex – is interspersed along with the Cdc3-mCherry throughout the ZMZ. GFP-Rax1 does not gain access to the cortex of the mating partner. In the pair of images on the right, the colors have been separated for clarity.  
Strains: ATY4774 x ATY5562.

**F. Impact of deletion of landmarks on bud site specification in *rax1*Δ zygotes**

A full panel of double mutants including the Rax1 deletion was generated, homotypic crosses were conducted, fixed and counted. Averages of the bud distributions (medial, lateral, terminal) from at least three independent experiments are plotted in each case. The dashed horizontal line indicates the control value for medial budding in *rax1*Δ zygotes as a point of reference. Quantitation is given in Table S2.

### **G/H. Distribution of cortical proteins in *rax1Δ* zygotes**

Proteins that guide the orientation of actin concentrate at the ZOC and scatter through the ZMZ cortex upon cell fusion. Deletion of Rax1 results in an increase in non-medial budding. We therefore asked whether the characteristic scattering from the ZOC to the ZMZ is affected in *rax1Δ* zygotes. As shown in the representative images of *rax1Δ* zygotes expressing Bni1-GFP (G) or Cdc24-GFP (H), crosses with strains that express Cdc3-mCherry do not show obvious wide-spread delocalization of these proteins during the time interval after cell-cell fusion that precedes bud emergence. Nevertheless, well-formed triads do subsequently appear at non-medial sites, presumably following delayed relocation of their proteins. The images of Bni1 are grazing sections of the cortex. The images of Cdc24 are more nearly medial. The annulus that includes septins is indicated (A). Strains: ATY5105, ATY5563, ATY5562.



Figure S2

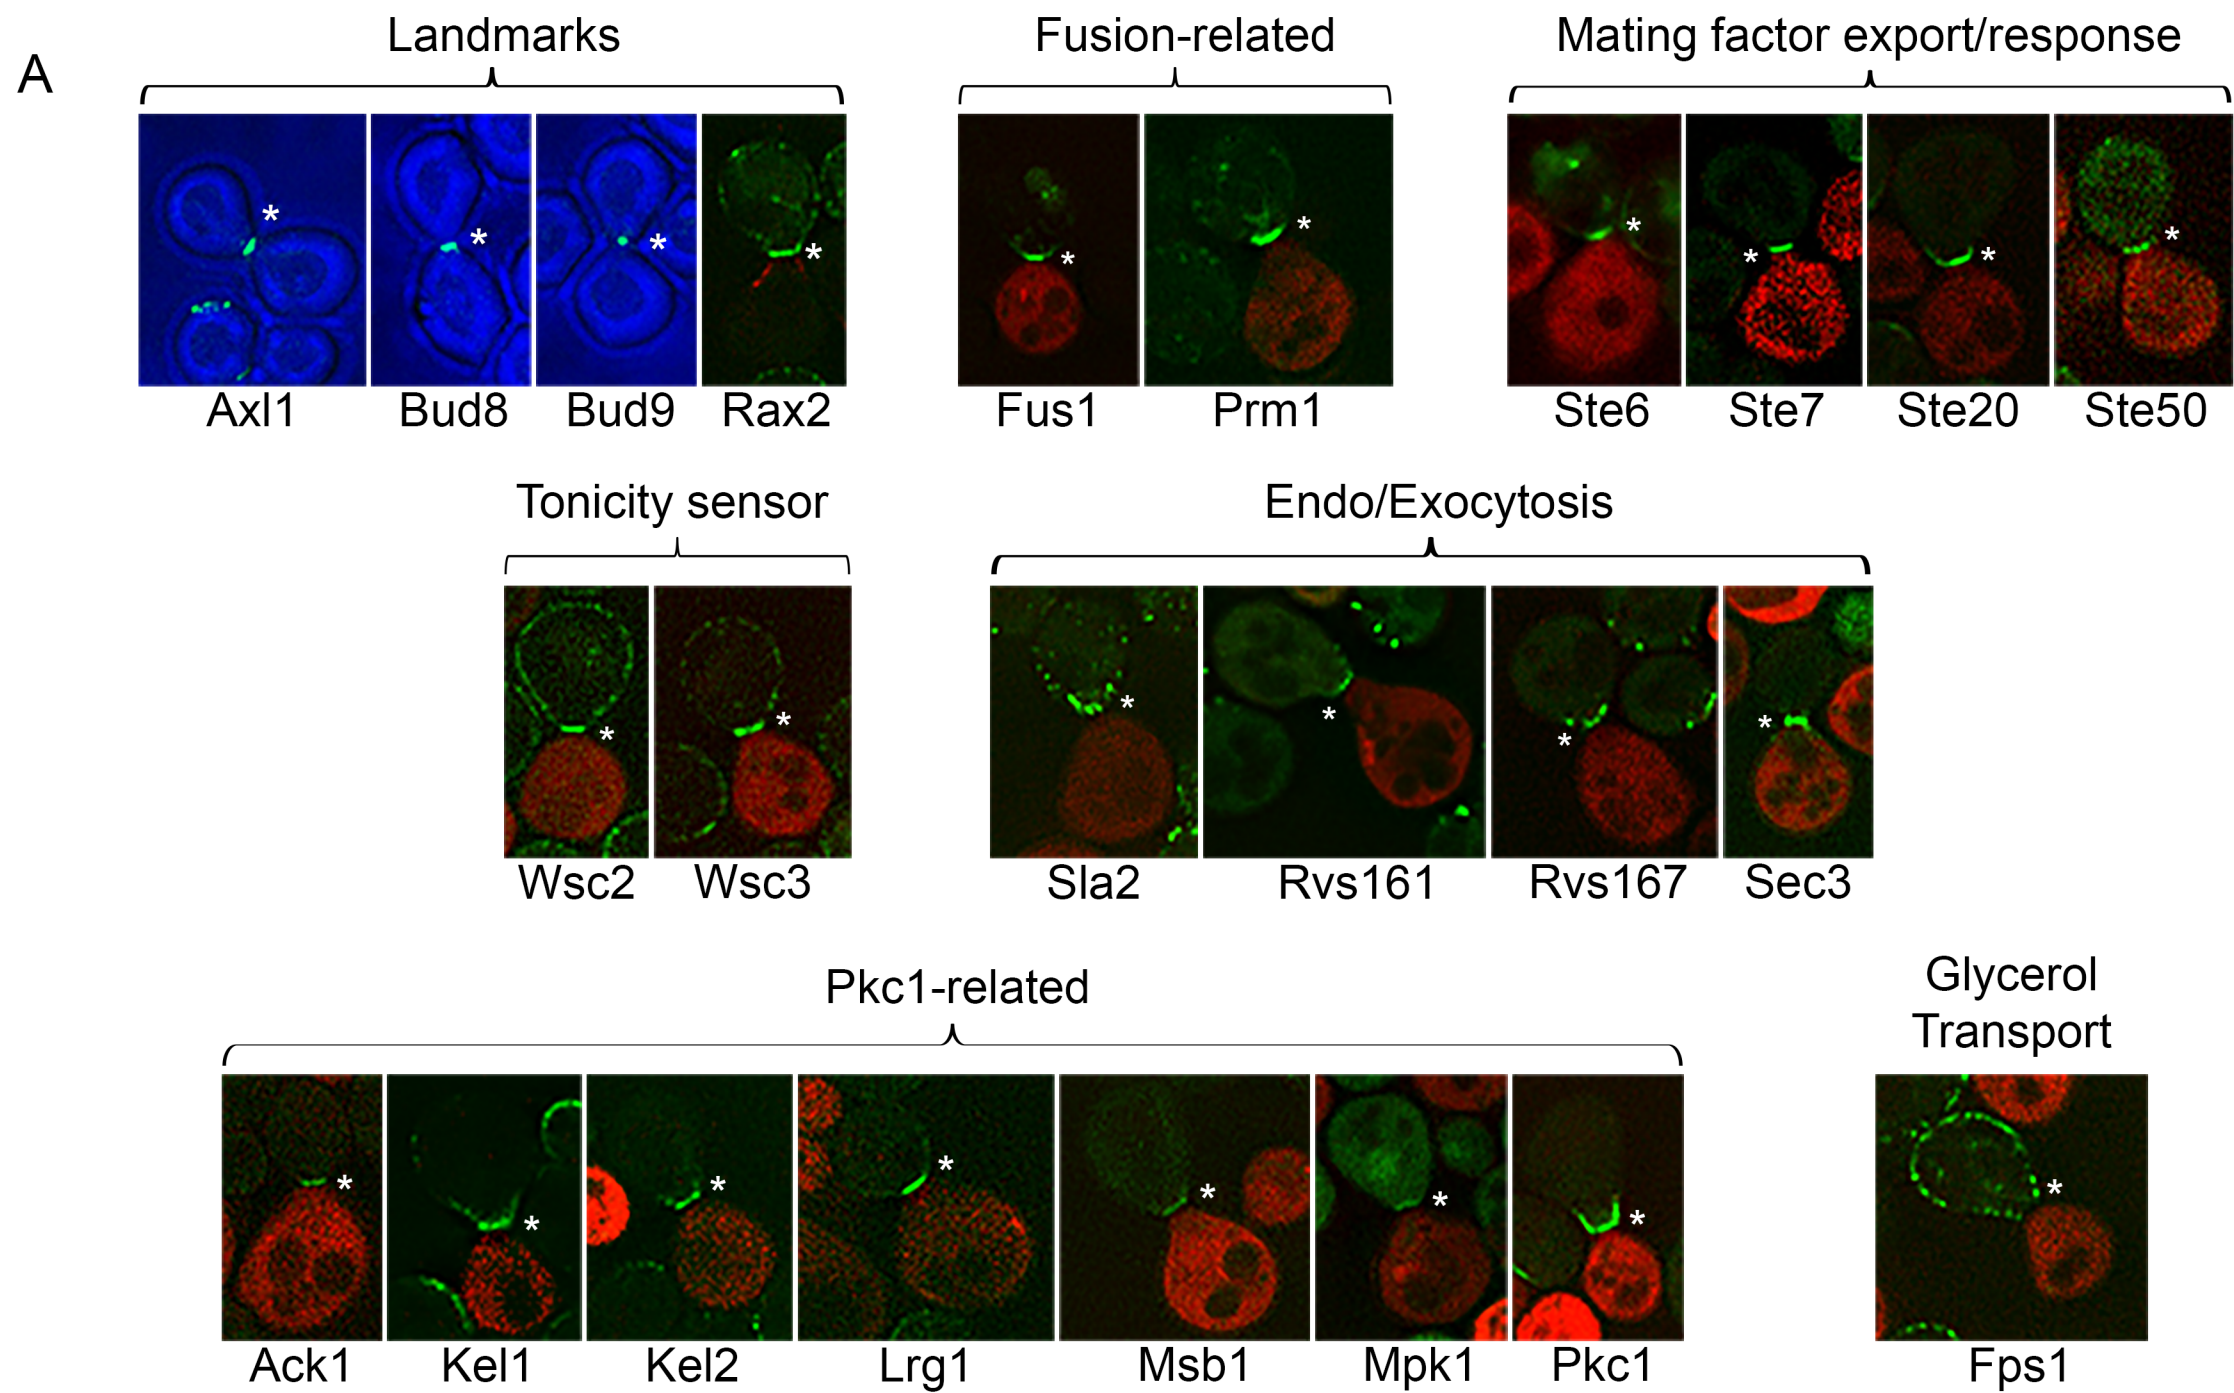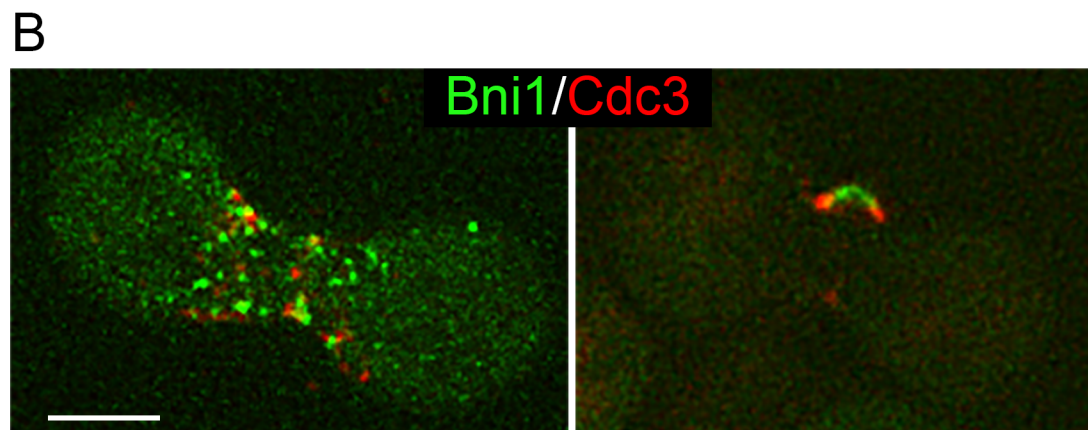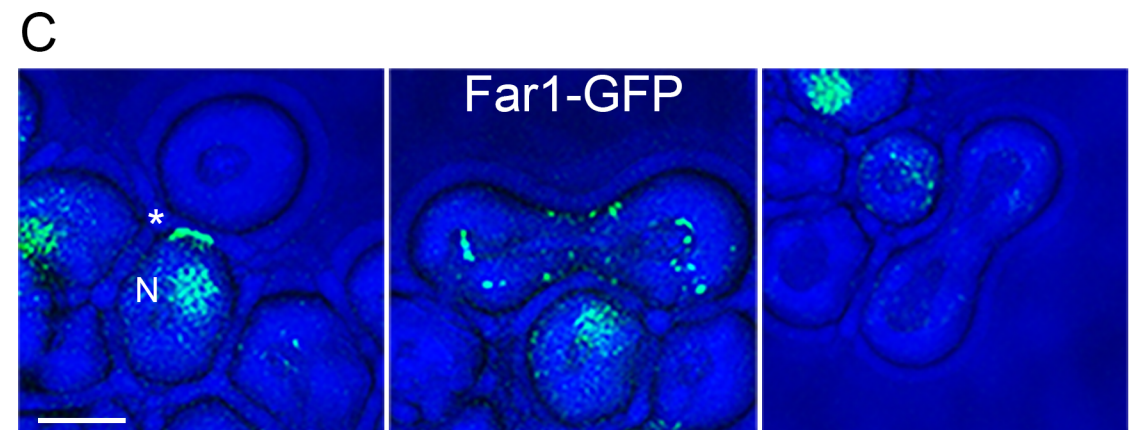



**Figure S2. Organization of the Zone of Contact** (Related to Figure 2)

**A. Composition of the ZOC.** In each case, crosses were examined after 4 hr to image prezygotes. The mating partner was either unlabeled (for Axl1, Bud8, Bud9 – brightfield images in blue), or expressed Cdc3-mCherry (for Rax2), or expressed cytoplasmic soluble dsRed (all other examples). In each case, the GFP-tagged protein accumulates at the ZOC (\*). In some cases the signal forms a spot or a broad cap. The other examples form a line. Note that the tagged glycerol transporter, Fps1, like Pma1, is absent from the ZOC.

The following strains were crossed with ATY4373, ATY5545 (Cdc3-mCherry) or ATY4971 (Cytoplasmic dsRed): The comments in parenthesis describe the localization of each protein in cycling haploid cells. Axl1-GFP [ATY5252] (cytokinetic rings), Bud8-GFP [ATY5253] (occasional dots at the cortex), Bud9-GFP [ATY5255] (bud tip/cortex), Rax2-GFP [ATY4982] (cortex, bud neck), Fus1-GFP [ATY5160] (not visible), Prm1-GFP [ATY5144] (occasional spots at the cortex), Ste6-GFP [ATY5392] (spots in the vacuole), Ste7-GFP [ATY5381] (faint throughout), Ste20-GFP [ATY5379] (bud cortex), Ste50-GFP [ATY5380] (faint throughout), Wsc2-GFP [ATY5145] (cortical spots), Wsc3-GFP [ATY5146] (cortical spots), Rvs161-GFP [ATY5150] (bud cortex spots), Rvs167-GFP [ATY5151] (cortical spots), Sec3-GFP [ATY5873] (bud cortex, bud neck), Ack1-GFP [ATY5301] (bud cortex, bud neck), Kel1-GFP [ATY5340] (bud cortex, bud neck), Kel2-GFP [ATY5341] (bud cortex, bud neck), Lrg1-GFP [ATY5307] (bud cortex, cytokinetic rings), Msb1-GFP [ATY5338] (bud cortex, bud neck), Mpk1-GFP [ATY5345] (faint nuclear signal), Pkc1-GFP [ATY5149] (bud neck, sites of bud emergence), Fps1-GFP [ATY5299] (cortical spots).

In parallel experiments with the Invitrogen collection of GFP-tagged strains, we noted that Agp2, Bap2, Bgl2, Can1, Chs3, Dip5, Exg1, Ftr1, Fui1, Lyp1, Mup1 are uniformly present around the cortex in prezygotes. Abp1, Aga2, Axl2, Bud3, Bud4, Cch1, Cmp2,

Cna1, Cnb1, Fig1, Fus2, Rom2, Sho1, Vps1 and Wsc1 concentrate at the ZOC. The cortical proteins, Lsp1, Mep1, Mep3, Mss4, Nha1, Pdr12, Pil1, Sln1, Snq2, Trk1, Trk2, Vht1 and Yor1 avoid the ZOC.

### **B. Progressive clearing of ZOC proteins during bud emergence**

Crosses were conducted between cells expressing Bni1-GFP and a cell expressing Cdc3-mCherry. After 4 hrs, the mating mixture was examined. Note in the images at the left the scattering and intermixing of foci of both green and red. With time (image at the right), little or no scattered signal remains and a characteristic triad appears. Strains: ATY5176/4312 x ATY5545.

### **C. Transience of Far1-GFP**

A cross was conducted between a strain expressing Far1-GFP and an unlabeled strain. Note that the Far1-GFP signal at the ZOC (\*, left) vanishes after cell fusion (middle and right images), prior to bud emergence. N: nucleus. Strains: ATY4979 x ATY4373.

Figure S3

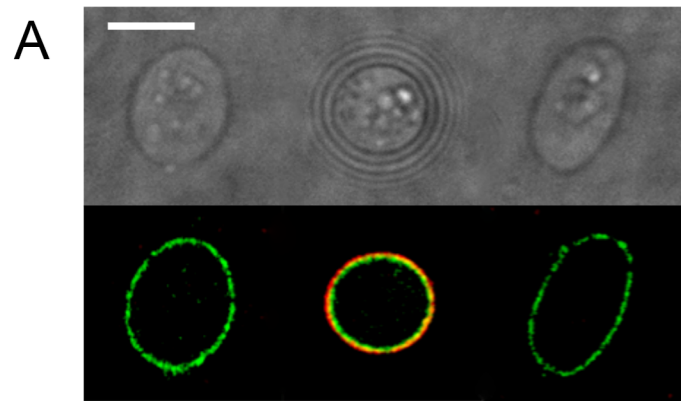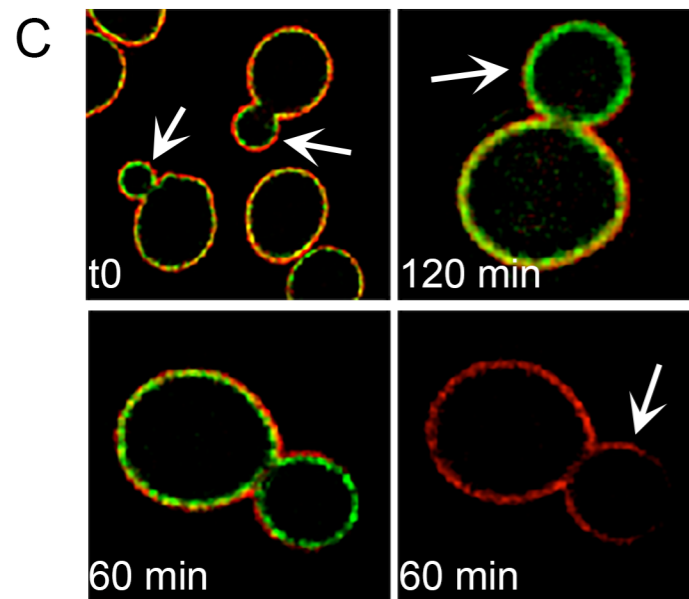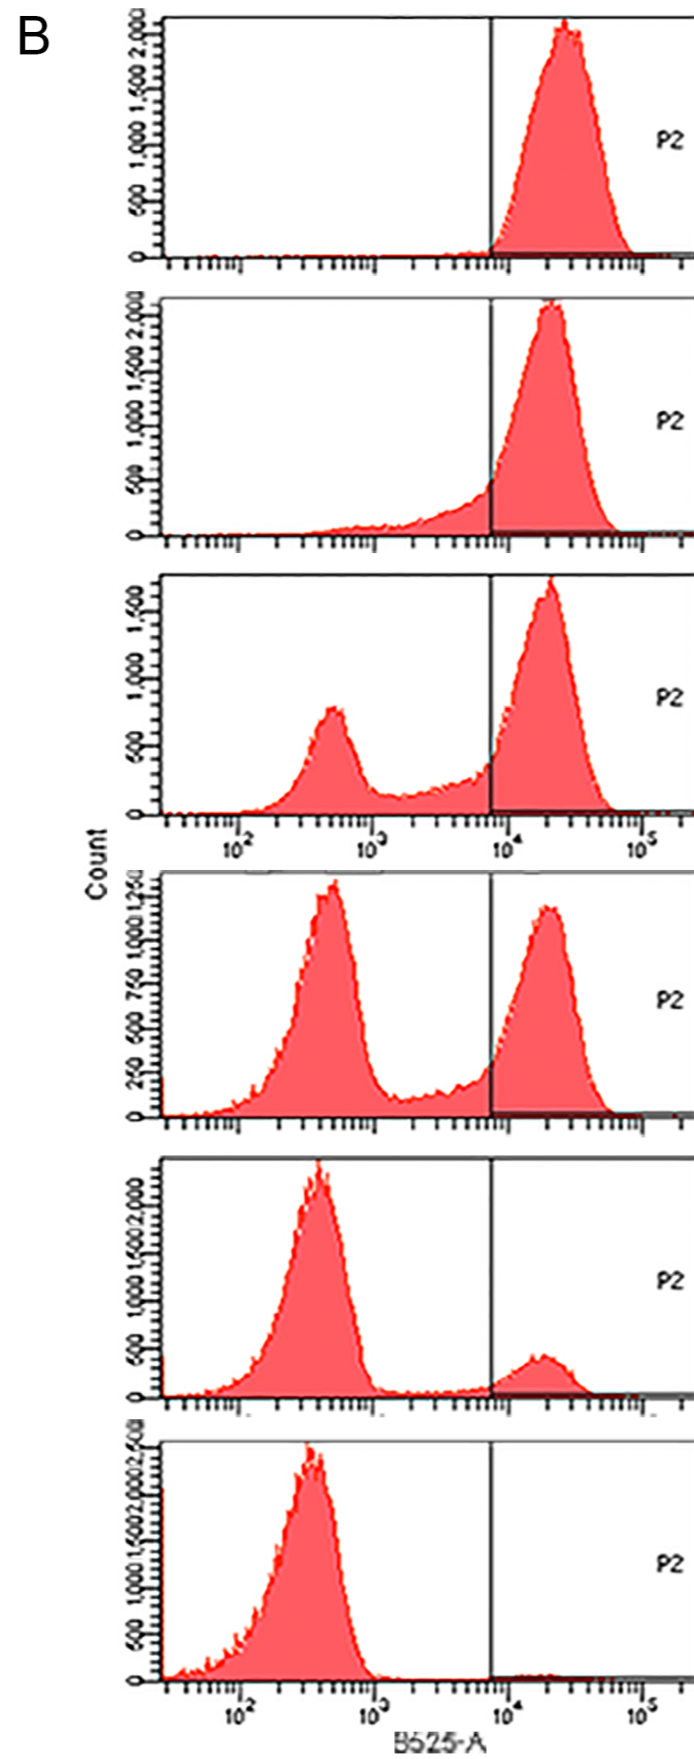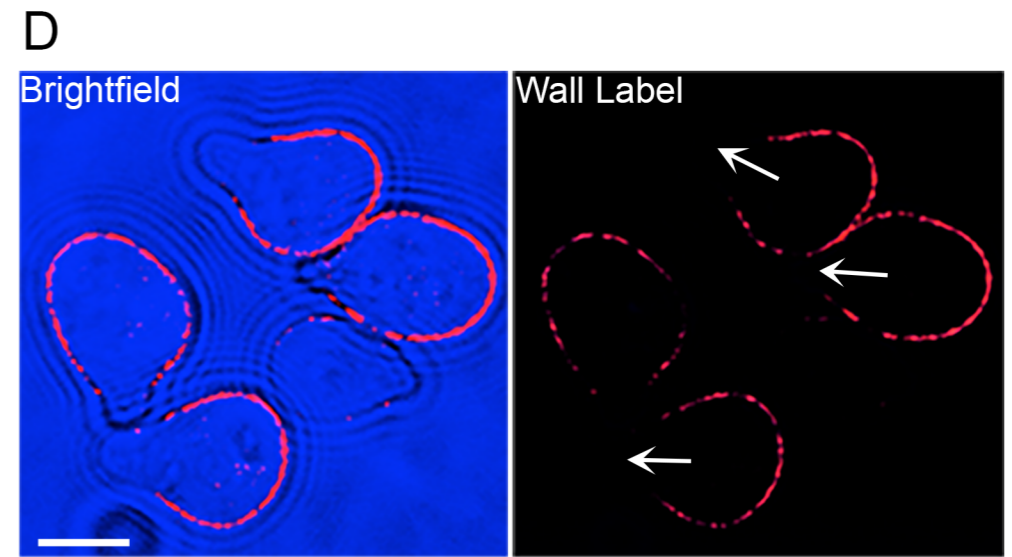

Wall label < Reincubate +  $\alpha$ F

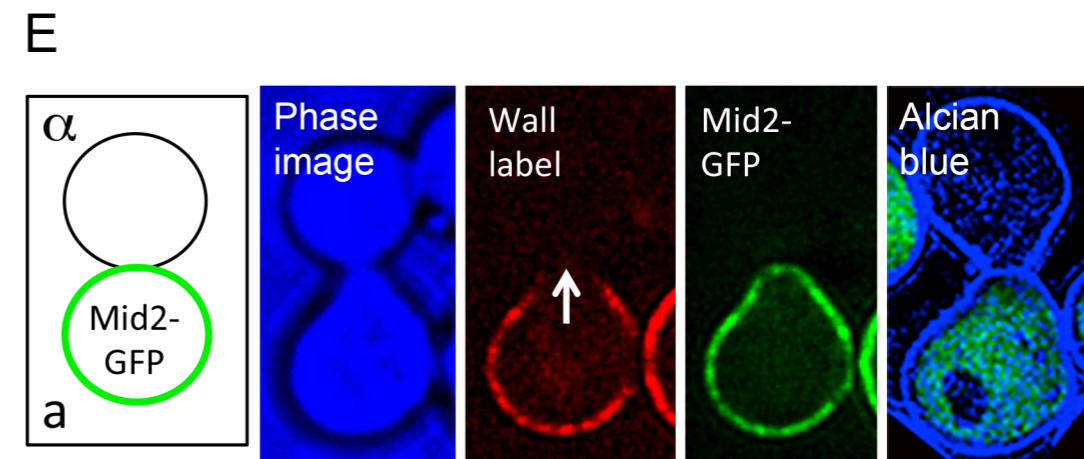

Label MAT a  
< Cross

Conclusion:  
Medial wall is new



**Figure S3. Site of Addition of New Cell Wall** (Related to Figure 3)

**A.** The cell wall of cells expressing Mid2-GFP [ATY1469] was labeled with red hydrazide (see below) and then partially spheroplasted. Top row: brightfield images. Bottom row: fluorescent images. Spheroplasted cells (right, left) lack refractility and show no cell wall signal, although Mid2-GFP is still visible. The refractile cell in the middle that has not been spheroplasted shows both red and green signals.

**B.** As judged by flow cytometry, the labeled population loses a fraction of its fluorescence intensity initially (probably due to release of partially-labeled buds), but the intensity of labeled cells then remains stable for many hours. Top-to-bottom: cells reincubated for 0, 2, 4, 6, 12 or 20 hrs. Samples of the labeled cells were also cultured in parallel with unlabeled cells. Their rates of growth were comparable to each other.

**C.** The Mid2-GFP-expressing cells [ATY1469] at the upper left (t<sub>0</sub>) were labeled immediately before imaging and therefore both the mother and bud are red (arrows). The lower panels illustrate cells after reincubation for 60 min. Note that the extremity of the bud is not labeled, as expected if its wall was produced during the reincubation. The arrow marks the transition from the labeled to unlabeled regions. Upper right: after 120 min of reincubation, the mother cell is still uniformly labeled (arrow) but the bud is not labeled. It therefore came into existence after the labeling interval.

**D.** A MAT a cell [ATY3852] was labeled and then exposed to mating factor for 3 hr. Left: brightfield. Right: fluorescent image. Note that the ends of the mating projection are no longer labeled (arrows). Thus, its cell wall is newly-synthesized.

**E.** MAT a cells expressing Mid2-GFP [ATY1469] were labeled and then mixed with MAT a cells expressing Mid2-GFP [ATY3852]. In the illustrated prezygote, note that the ZOC, although green, is not red (arrow). Thus the cell wall overlying the ZOC is newly-

synthesized. The rightmost panel shows an equivalent preparation in which the wall is stained by including 0.5% Alcian blue in the agarose pad. The image proves that wall material is present at the ZOC. One of the partners expressed cytoplasmic GFP, thereby proving that cell-cell fusion had not occurred.

Labeling Method: Cultures of rapidly-growing cells were chilled on ice for 15 minutes, washed in PBS, and oxidized with 0.5 mM sodium m-periodate in PBS for 15 minutes on ice. After two washes, they were incubated on ice for 30 minutes with 0.5 mg/ml Texas Red- or fluorescein-hydrazide (Invitrogen) [or 13 mM CF488A Aminoxy (Biotium)] in PBS. Cells were then washed twice and returned to growth medium.

Comment: Earlier studies have not examined the timing of cell wall synthesis in prezygotes; however, similar approaches have been used to localize new cell wall in cycling cells and in cells exposed to isotropic mating factor. These studies conclude that new cell wall is added at the bud tip and at the tip of the mating projection (Chung et al., 1965; Schekman and Brawley, 1979; Tkacz and Lampen, 1972).

**References:**

- Chung, K.L., Hawirko, R.Z., and Isaac, P.K. (1965). Cell wall replication in *Saccharomyces cerevisiae*. *Canadian journal of microbiology* 11, 953-957.
- Fujita, A., Lord, M., Hiroko, T., Hiroko, F., Chen, T., Oka, C., Misumi, Y., and Chant, J. (2004). Rax1, a protein required for the establishment of the bipolar budding pattern in yeast. *Gene* 327, 161-169.
- Schekman, R., and Brawley, V. (1979). Localized deposition of chitin on the yeast cell surface in response to mating pheromone. *Proc Natl Acad Sci U S A* 76, 645-649.
- Tkacz, J.S., and Lampen, J.O. (1972). Wall replication in *saccharomyces* species: use of fluorescein-conjugated concanavalin A to reveal the site of mannan insertion. *J Gen Microbiol* 72, 243-247.

A

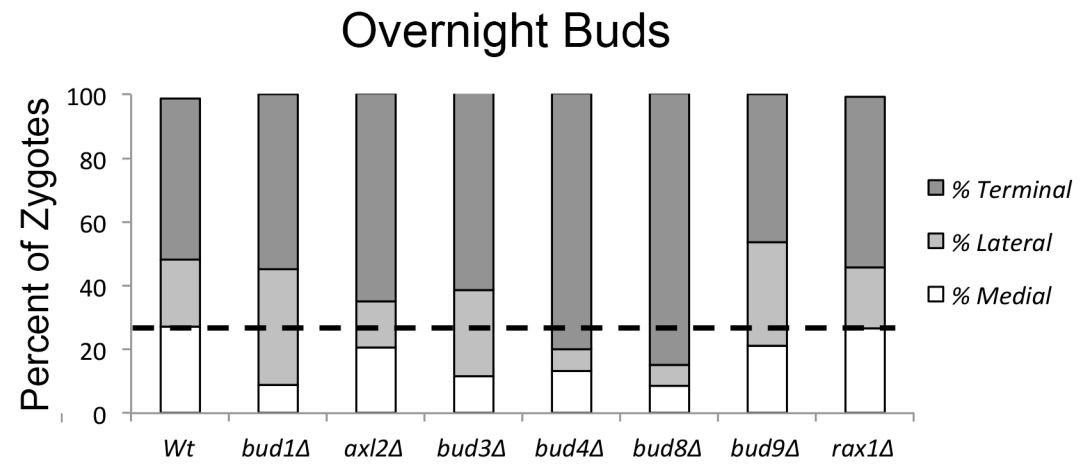

B

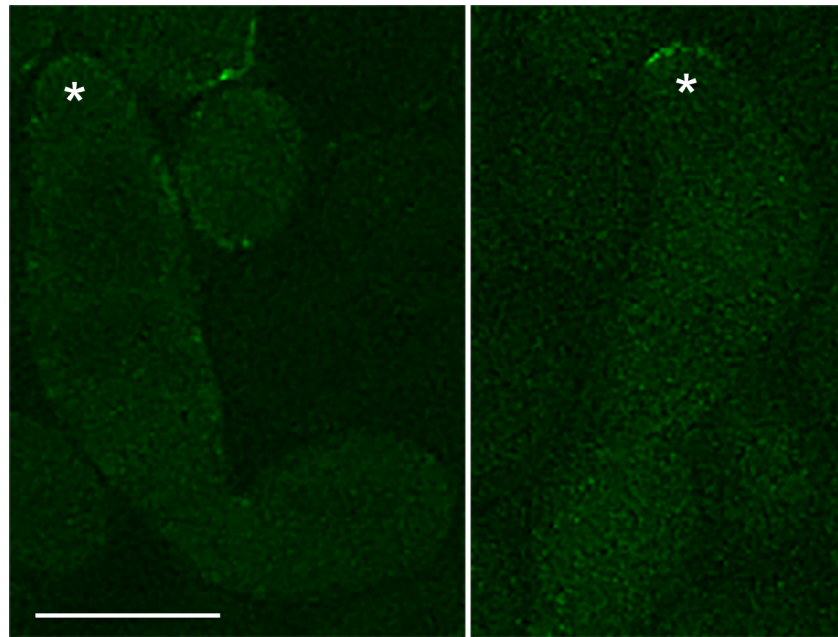

GFP-Bud8



**Figure S4. Late Bud Emergence** (Related to Figure 4)

**A. Late bud site specification in deletion strains.** In each case, corresponding deletion strains were crossed for 5 hr and then reincubated for 15 hr under conditions that do not allow further zygote formation. Note that budding has become extensively non-medial, regardless of whether Bud1 and landmarks are present. See Table S2 for quantitation. Strains: See legend of Figure 3G.

**B. Distribution of Bud8 in late zygotes.**

Two strains that express GFP-Bud8 were crossed for 5 hr and then reincubated for 15 hr. Although a cortical signal can be detected in haploid and diploid cells, the only signal in these late zygotes is very faint. In the example on the left, the signal is broadly distributed at the cortex, with some concentration at the end (\*). In the example on the right, the restriction to the end of the zygote is more evident (\*). Strains: ATY4308 x ATY4279.

| <b>Table S1. Distribution of Landmark Proteins</b>                                                                                                                                                                                                                                                                                                                                                                                                                                                                                                                                                                                                        |                                             |            |                                  |     |                |                 |                 |  |
|-----------------------------------------------------------------------------------------------------------------------------------------------------------------------------------------------------------------------------------------------------------------------------------------------------------------------------------------------------------------------------------------------------------------------------------------------------------------------------------------------------------------------------------------------------------------------------------------------------------------------------------------------------------|---------------------------------------------|------------|----------------------------------|-----|----------------|-----------------|-----------------|--|
|                                                                                                                                                                                                                                                                                                                                                                                                                                                                                                                                                                                                                                                           | Present in Haploid (H), Diploid (D) Cells ? | References | Distribution in Zygotes          |     |                |                 |                 |  |
|                                                                                                                                                                                                                                                                                                                                                                                                                                                                                                                                                                                                                                                           |                                             |            | Early*                           |     |                |                 | Late**          |  |
|                                                                                                                                                                                                                                                                                                                                                                                                                                                                                                                                                                                                                                                           |                                             |            | Cortical ring                    | ZOC | Bud tip/cortex | 2 rings at neck | 2 rings at neck |  |
| <b>Haploid Landmarks</b>                                                                                                                                                                                                                                                                                                                                                                                                                                                                                                                                                                                                                                  |                                             |            |                                  |     |                |                 |                 |  |
| Axl1                                                                                                                                                                                                                                                                                                                                                                                                                                                                                                                                                                                                                                                      | H                                           | (1)        | -                                | +   | -              | -               | -               |  |
| Axl2                                                                                                                                                                                                                                                                                                                                                                                                                                                                                                                                                                                                                                                      | H, D                                        | (2-4)      | +                                | -   | +              | +               | +               |  |
| Bud3                                                                                                                                                                                                                                                                                                                                                                                                                                                                                                                                                                                                                                                      | H, D                                        | (5)        | +                                | -   | -              | +               | +               |  |
| Bud4                                                                                                                                                                                                                                                                                                                                                                                                                                                                                                                                                                                                                                                      | H, D                                        | (6)        | +                                | -   | -              | +               | +               |  |
| <b>Diploid Landmarks</b>                                                                                                                                                                                                                                                                                                                                                                                                                                                                                                                                                                                                                                  |                                             |            |                                  |     |                |                 |                 |  |
| Bud8                                                                                                                                                                                                                                                                                                                                                                                                                                                                                                                                                                                                                                                      | H, D                                        | (7, 8)     | -                                | +   | +              | -               | -               |  |
| Bud9                                                                                                                                                                                                                                                                                                                                                                                                                                                                                                                                                                                                                                                      | H, D                                        | (7, 8)     | -                                | +   | +              | -               | -               |  |
| Rax1                                                                                                                                                                                                                                                                                                                                                                                                                                                                                                                                                                                                                                                      | H, D                                        | (8, 9)     | Widespread along the cortex, ZOC |     |                |                 |                 |  |
| Rax2                                                                                                                                                                                                                                                                                                                                                                                                                                                                                                                                                                                                                                                      | H, D                                        | (8, 10)    | Widespread along the cortex, ZOC |     |                |                 |                 |  |
| <p>* In each case, twenty zygotes from a 5 hr mating mixture were photographed at random. ** Equivalent observations on zygotes that were recultured for 15 hr. The distributions indicated are representative of the majority. The cortical ring is likely a remnant from haploid budding history. When two rings are at the neck, one becomes associated with the mother and one with the bud. Each of the following MAT a strains expressing a GFP-tagged landmark protein was studied after a cross with ATY4373: Axl1 (ATY5252), Axl2 (ATY5251), Bud3 (ATY5194), Bud4 (ATY5195), Bud8 (ATY5253), Bud9 (ATY5255), Rax1 (ATY5493), Rax2 (ATY4982).</p> |                                             |            |                                  |     |                |                 |                 |  |

| <b>Table S2. Quantitation of Bud Site Distributions (after fixation)</b> |                            |                 |                  |                   |                   |
|--------------------------------------------------------------------------|----------------------------|-----------------|------------------|-------------------|-------------------|
| <b>Cross</b>                                                             | <b>Genotype</b>            | <b>% Medial</b> | <b>% Lateral</b> | <b>% Terminal</b> | <b>Strains</b>    |
| <b>Initial Buds</b>                                                      |                            |                 |                  |                   |                   |
| 1                                                                        | Wt (S288C - BY4741)        | 83.7 +/- 4.3    | 12.1 +/- 2.1     | 4.2 +/- 2.2       | ATY3852 x ATY4373 |
| 2                                                                        | Wt (W303)                  | 91.4 +/- 1.0    | 4.8 +/- 0.9      | 3.8 +/- 1.6       | ATY2109 x ATY2110 |
| 3                                                                        | <i>axl2Δ</i>               | 78.0 +/- 13.3   | 12.0 +/- 9.5     | 9.7 +/- 6.8       | ATY5619 x ATY5620 |
| 4                                                                        | <i>bud1Δ</i>               | 97.3 +/- 2.5    | 1.7 +/- 1.9      | 0.6 +/- 0.7       | ATY4227 x ATY4256 |
| 5                                                                        | <i>bud3Δ</i>               | 94.2 +/- 3.7    | 4.7 +/- 3.3      | 1.0 +/- 0.5       | ATY4813 x ATY4851 |
| 6                                                                        | <i>bud4Δ</i>               | 83.8 +/- 7.7    | 14.0 +/- 5.7     | 2.2 +/- 2.0       | ATY4191 x ATY4275 |
| 7                                                                        | <i>bud8Δ</i>               | 81.1 +/- 3.9    | 12.2 +/- 4.2     | 6.7 +/- 3.6       | ATY4815 x ATY6283 |
| 8                                                                        | <i>bud9Δ</i>               | 87.2 +/- 6.5    | 12.3 +/- 4.3     | 4.7 +/- 3.2       | ATY4814 x ATY4832 |
| 9                                                                        | <i>rax1Δ</i>               | 46.1 +/- 4.4    | 32.6 +/- 3.3     | 20.8 +/- 6.7      | ATY4297 x ATY4304 |
| 10                                                                       | <i>sst2Δ</i>               | 96.4 +/- 1.8    | 2.9 +/- 1.5      | 0.7 +/- 0.8       | ATY4997 x ATY5125 |
| 11                                                                       | <i>far1-H7</i>             | 85.6 +/- 6.5    | 9.5 +/- 4.4      | 4.9 +/- 2.6       | ATY5269 x ATY5279 |
| 12                                                                       | Wt (W303) x <i>kar1Δ15</i> | 91.2 +/- 4.5    | 3.0 +/- 2.1      | 5.5 +/- 3.7       | ATY4503 x ATY4263 |
| 13                                                                       | <i>cdc12-6</i> (22-25°C)*  | 62.3 +/- 7.4    | 19.1 +/- 5.9     | 14.1 +/- 9.7      | ATY2089 x ATY4028 |
| <b>Initial buds in <i>rax1Δ</i> Double Mutants</b>                       |                            |                 |                  |                   |                   |
| 14                                                                       | <i>rax1Δ axl2Δ</i>         | 59.9 +/- 9.2    | 21.8 +/- 4.9     | 18.2 +/- 5.0      | ATY5931 x ATY5932 |
| 15                                                                       | <i>rax1Δ bud1Δ</i>         | 89.9 +/- 2.2    | 6.5 +/- 0.5      | 3.0 +/- 1.6       | ATY5037 x ATY5038 |
| 16                                                                       | <i>rax1Δ bud3Δ</i>         | 71.5 +/- 6.5    | 19.7 +/- 4.3     | 8.7 +/- 4.0       | ATY5879 x ATY5880 |
| 17                                                                       | <i>rax1Δ bud4Δ</i>         | 39.9 +/- 7.7    | 37.2 +/- 1.9     | 22.9 +/- 6.6      | ATY6019 x ATY6016 |
| 18                                                                       | <i>rax1Δ bud8Δ</i>         | 39.6 +/- 7.0    | 32.6 +/- 6.6     | 27.9 +/- 5.9      | ATY6017 x ATY6018 |
| 19                                                                       | <i>rax1Δ bud9Δ</i>         | 57.8 +/- 4.4    | 31.1 +/- 5.0     | 11.1 +/- 2.7      | ATY5928 x ATY5929 |
| <b>Overnight Buds (+ 15 hr)</b>                                          |                            |                 |                  |                   |                   |
| 20                                                                       | Wt                         | 27.2 +/- 8.6    | 20.9 +/- 13.1    | 50.7 +/- 13.1     | ATY4303 x ATY4307 |
| 21                                                                       | <i>fob1Δ</i>               | 14.5 +/- 8.2    | 16.0 +/- 4.3     | 69.5 +/- 8.7      | ATY5887 x ATY5894 |

\* Temperatures above 26°C could not be used for these crosses due to the dramatic increase in complex zygote forms (multiple buds, lack of cytokinesis, etc.).



**Table S3. Contiguity of Medial Bud Scars; Relative Proportion of Lateral vs Terminal Scars  
(5 + 15 hr protocols, stained with Calcofluor White)**

| Relevant Genotype                                                |  |  |  |  | Contiguity Index * | Terminal/Lateral * | Strain Numbers   |
|------------------------------------------------------------------|-----------------------------------------------------------------------------------|-----------------------------------------------------------------------------------|-----------------------------------------------------------------------------------|------------------------------------------------------------------------------------|--------------------|--------------------|------------------|
|                                                                  | medial                                                                            | twin                                                                              | necklace                                                                          | lanyard                                                                            |                    |                    |                  |
|                                                                  | Average Percent of Zygotes                                                        |                                                                                   |                                                                                   |                                                                                    |                    |                    |                  |
| wt x wt                                                          | 39                                                                                | 33                                                                                | 13                                                                                | 0                                                                                  | 0.53+/-0.08 (138)  | 1.16+/-0.16 (457)  | ATY4307, ATY4303 |
| <i>bud1Δ</i> x <i>bud1Δ</i>                                      | 95                                                                                | 0                                                                                 | 0                                                                                 | 0                                                                                  | 0 (269)            | 0.77+/-0.07 (899)  | ATY4602, ATY4907 |
| <i>axl2Δ</i> x <i>axl2Δ</i>                                      | 93                                                                                | 0                                                                                 | 0                                                                                 | 0                                                                                  | 0 (78)             | 2.6+/-0.86 (252)** | ATY5881, ATY5860 |
| <i>bud3Δ</i> x <i>bud3Δ</i>                                      | 92                                                                                | 0                                                                                 | 0                                                                                 | 0                                                                                  | 0 (61)             | 1.9+/-0.1 (195)    | ATY5882, ATY5861 |
| <i>bud4Δ</i> x <i>bud4Δ</i>                                      | 97                                                                                | 0                                                                                 | 0                                                                                 | 0                                                                                  | 0 (58)             | 1.6+/-0.14 (302)   | ATY5883, ATY5862 |
| <i>bud8Δ</i> x <i>bud8Δ</i>                                      | 21                                                                                | 41                                                                                | 27                                                                                | 9                                                                                  | 0.77+/-0.02 (63)   | 0.75+/-0.08 (397)  | ATY5884, ATY6284 |
| <i>bud9Δ</i> x <i>bud9Δ</i>                                      | 31                                                                                | 33                                                                                | 20                                                                                | 16                                                                                 | 0.63+/-0.02 (150)  | 0.47+/-0.08 (882)  | ATY5885, ATY5864 |
| <i>rax1Δ</i> x <i>rax1Δ</i>                                      | 31                                                                                | 38                                                                                | 15                                                                                | 0                                                                                  | 0.61+/-0.12 (107)  | 1.22+/-0.16 (528)  | ATY5052, ATY5477 |
| wt x GAL-Axl1, gal                                               | 13                                                                                | 5                                                                                 | 29                                                                                | 55                                                                                 | 0.91+/-0.05 (138)  | NA                 | ATY3328, ATY6125 |
| wt [pbud1 <sup>dn</sup> ] x GAL-Axl1 [pbud1 <sup>dn</sup> ], gal | 98                                                                                | 0                                                                                 | 0                                                                                 | 0                                                                                  | 0 (263)            | NA                 | ATY5056, ATY6179 |

The contiguity index is the number of zygotes in which medial scars show contiguity divided by that number plus the number with a solitary medial bud. The terminal/lateral tabulation is the number of scars at the terminae divided by the number of lateral scars.

\* The entries in parentheses indicate the total number of zygotes studied (for the contiguity index) or total number of scars counted (for the terminal/lateral tabulation).

\*\* Many *axl2Δ* zygotes have bizarre shapes, making it difficult to classify their buds.

**Table S4. Strain List**

| Strain                                                                         | Relevant Genotype                                            | Parent | Plasmid | Cell Source        |
|--------------------------------------------------------------------------------|--------------------------------------------------------------|--------|---------|--------------------|
| <b>Reference Strains</b>                                                       |                                                              |        |         |                    |
| ATY3852                                                                        | MATa <i>his3Δ1 leu2Δ0 met15Δ0 ura3Δ0</i>                     | S288C  |         | Invitrogen, BY4741 |
| ATY4373                                                                        | MATα <i>his3Δ1 leu2Δ0 met15Δ0 ura3Δ0</i>                     | S288C  |         | ATY3852            |
| ATY2111                                                                        | MATa <i>leu2-3,112 trp1-1 ura3-1 ade2-1 his3-11,15 RAD5+</i> | W303   |         | K. Runge           |
| ATY2112                                                                        | MATα <i>leu2-3,112 trp1-1 ura3-1 ade2-1 his3-11,15 RAD5+</i> | W303   |         | K. Runge           |
| <b>Bud1 Deletion and Landmark Deletion Strains</b>                             |                                                              |        |         |                    |
| ATY5619                                                                        | MATa <i>axl2::KanMX6</i>                                     | S288C  |         | Invitrogen         |
| ATY5620                                                                        | MATα <i>axl2::KanMX6</i>                                     | S288C  |         | ATY5619            |
| ATY5881                                                                        | MATa <i>axl2::KanMX6</i>                                     | S288C  | pRS316  | ATY5620            |
| ATY5860                                                                        | MATα <i>axl2::KanMX6</i>                                     | S288C  | pRS315  | ATY5619            |
| ATY4227                                                                        | MATa <i>bud1::KanMX6</i>                                     | S288C  |         | Invitrogen         |
| ATY4256                                                                        | MATα <i>bud1::KanMX6</i>                                     | S288C  |         | ATY4227            |
| ATY6213                                                                        | MATa <i>bud1::KanMX6</i>                                     | S288C  | pRS316  | ATY4227            |
| ATY4907                                                                        | MATα <i>bud1::KanMX6</i>                                     | S288C  | pRS315  | ATY4256            |
| ATY4813                                                                        | MATa <i>bud3::KanMX6</i>                                     | S288C  |         | Invitrogen         |
| ATY4851                                                                        | MATα <i>bud3::KanMX6</i>                                     | S288C  |         | ATY4813            |
| ATY5882                                                                        | MATa <i>bud3::KanMX6</i>                                     | S288C  | pRS316  | ATY4813            |
| ATY5861                                                                        | MATα <i>bud3::KanMX6</i>                                     | S288C  | pRS315  | ATY4851            |
| ATY4191                                                                        | MATa <i>bud4::KanMX6</i>                                     | S288C  |         | Invitrogen         |
| ATY4275                                                                        | MATα <i>bud4::KanMX6</i>                                     | S288C  |         | ATY4275            |
| ATY5883                                                                        | MATa <i>bud4::KanMX6</i>                                     | S288C  | pRS316  | ATY4191            |
| ATY5862                                                                        | MATα <i>bud4::KanMX6</i>                                     | S288C  | pRS315  | ATY4275            |
| ATY4815                                                                        | MATa <i>bud8::KanMX6</i>                                     | S288C  |         | Invitrogen         |
| ATY6283                                                                        | MATα <i>bud8::KanMX6</i>                                     | S288C  |         | ATY4827            |
| ATY5884                                                                        | MATa <i>bud8::KanMX6</i>                                     | S288C  | pRS316  | ATY4815            |
| ATY6284                                                                        | MATα <i>bud8::KanMX6</i>                                     | S288C  | pRS315  | ATY4827            |
| ATY4814                                                                        | MATa <i>bud9::KanMX6</i>                                     | S288C  |         | Invitrogen         |
| ATY4832                                                                        | MATα <i>bud9::KanMX6</i>                                     | S288C  |         | ATY4814            |
| ATY5885                                                                        | MATa <i>bud9::KanMX6</i>                                     | S288C  | pRS316  | ATY4814            |
| ATY5864                                                                        | MATα <i>bud9::KanMX6</i>                                     | S288C  | pRS315  | ATY4832            |
| ATY5501                                                                        | MATa <i>rax1::KanMX6</i>                                     | S288C  |         | Invitrogen         |
| ATY5500                                                                        | MATα <i>rax1::KanMX6</i>                                     | S288C  |         | ATY5501            |
| ATY5052                                                                        | MATa <i>rax1::KanMX6</i>                                     | S288C  | pRS316  | ATY4814            |
| ATY5477                                                                        | MATα <i>rax1::KanMX6</i>                                     | S288C  | pRS315  | ATY5501            |
| <b>Rax1 Double Deletion Strains</b>                                            |                                                              |        |         |                    |
| ATY5544                                                                        | MATa <i>Cdc3-mCherry rax1::KanMX6</i>                        | S288C  | pAT1368 | This study         |
| ATY5562                                                                        | MATα <i>Cdc3-mCherry rax1::KanMX6</i>                        | S288C  | pAT1368 | This study         |
| ATY5931                                                                        | MATa <i>axl2::KanMX6 rax1::HPHNT1</i>                        | S288C  |         | This study         |
| ATY5930                                                                        | MATα <i>axl2::KanMX6 rax1::HPHNT1</i>                        | S288C  |         | This study         |
| ATY5037                                                                        | MATa <i>bud1::KanMX6 rax1::KanMX6</i>                        | S288C  |         | ATY4297, ATY4227   |
| ATY5038                                                                        | MATα <i>bud1::KanMX6 rax1::KanMX6</i>                        | S288C  |         | ATY4297, ATY4227   |
| ATY5880                                                                        | MATa <i>bud3::KanMX6 rax1::HPHNT1</i>                        | S288C  |         | This study         |
| ATY5879                                                                        | MATα <i>bud3::KanMX6 rax1::HPHNT1</i>                        | S288C  |         | This study         |
| ATY6019                                                                        | MATa <i>bud4::KanMX6 rax1::HPHNT1</i>                        | S288C  |         | This study         |
| ATY6016                                                                        | MATα <i>bud4::KanMX6 rax1::HPHNT1</i>                        | S288C  |         | This study         |
| ATY6017                                                                        | MATa <i>bud8::KanMX6 rax1::HPHNT1</i>                        | S288C  |         | This study         |
| ATY6018                                                                        | MATα <i>bud8::KanMX6 rax1::HPHNT1</i>                        | S288C  |         | This study         |
| ATY5929                                                                        | MATa <i>bud9::KanMX6 rax1::HPHNT1</i>                        | S288C  |         | This study         |
| ATY5928                                                                        | MATα <i>bud9::KanMX6 rax1::HPHNT1</i>                        | S288C  |         | This study         |
| <b>Other Deletion Strains, Mutants, Strains with Fluorescent Markers, etc.</b> |                                                              |        |         |                    |
| ATY4307                                                                        | MATa ATY3852                                                 | S288C  | pRS316  | ATY3852            |
| ATY4303                                                                        | MATα ATY4373                                                 | S288C  | pRS315  | ATY4373            |
| ATY2089                                                                        | MATa <i>cdc12-6</i>                                          | S288C  |         | E. Bi, #743        |
| ATY4028                                                                        | MATα <i>cdc12-6</i>                                          | S288C  |         | ATY2089            |

|         |                                                               |         |         |                        |
|---------|---------------------------------------------------------------|---------|---------|------------------------|
| ATY5194 | MATa Bud3-GFP                                                 | S288C   |         | Invitrogen             |
| ATY5195 | MATa Bud4-GFP                                                 | S288C   |         | Invitrogen             |
| ATY4312 | MATa Sec5-GFP                                                 | S288C   |         | W. Guo, GY1143         |
| ATY4774 | MAT $\alpha$ GFP-Rax1                                         | S288C   |         | pHP1109, H-O Park      |
| ATY5124 | MATa <i>far1-H7</i>                                           | SEY6210 |         | RAY1423, R. Arkovitz   |
| ATY5279 | MAT $\alpha$ <i>far1-H7</i>                                   | SEY6210 |         | ATY5124                |
| ATY5297 | MATa Pma1-GFP                                                 | S288C   |         | Invitrogen             |
| ATY5637 | MATa Cdc3-mCherry                                             | S288C   | pAT1368 | ATY3852                |
| ATY5545 | MAT $\alpha$ Cdc3-mCherry                                     | S288C   | pAT1368 | ATY4373                |
| ATY5887 | MATa <i>fob1::KanMX6</i>                                      | S288C   | pRS316  | Invitrogen             |
| ATY5926 | MAT $\alpha$ <i>fob1::KanMX6</i>                              | S288C   | pRS315  | ATY5887                |
| ATY5896 | MATa Cdc3-mCherry Pma1-GFP                                    | S288C   | pAT1368 | ATY5297                |
| ATY4263 | MAT $\alpha$ <i>kar1<math>\Delta</math>15</i>                 | W303    |         | R. Rothstein W2108-14C |
| ATY5176 | MATa Bni1-GFP                                                 | S288C   |         | Invitrogen             |
| ATY5563 | MAT $\alpha$ Bni1-3GFP <i>rax1<math>\Delta</math>::KanMX6</i> | S288C   |         | This study             |
| ATY5001 | MATa Cdc24-GFP                                                | S288C   |         | Invitrogen             |
| ATY5105 | Cdc24-GFP <i>rax1<math>\Delta</math>::KanMX6</i>              | S288C   |         | This study             |
| ATY1469 | MAT $\alpha$ Mid2-GFP                                         | SEY6210 |         | S. Emr                 |
| ATY4982 | MATa Rax2-GFP                                                 | S288C   |         | Invitrogen             |
| ATY4308 | MATa                                                          | S288C   | pAT1301 | This study             |
| ATY4279 | MAT $\alpha$                                                  | S288C   | pAT1301 | This study             |
| ATY5253 | MATa Bud8-GFP                                                 | S288C   |         | Invitrogen             |
| ATY5255 | MATa Bud9-GFP                                                 | S288C   |         | Invitrogen             |
| ATY5493 | MATa GFP-Rax1                                                 | S288C   |         | This study             |
| ATY4982 | MATa Rax2-GFP                                                 | S288C   |         | Invitrogen             |
| ATY4971 | MAT $\alpha$ Cyt-dsRed                                        | S288C   | pAT1145 | ATY4373                |
| ATY5252 | MATa Axl1-GFP                                                 | S288C   |         | Invitrogen             |
| ATY5251 | MATa Axl2-GFP                                                 | S288C   |         | Invitrogen             |
| ATY5160 | MATa Fus1-GFP                                                 | S288C   |         | Invitrogen             |
| ATY5144 | MATa Prm1-GFP                                                 | S288C   |         | Invitrogen             |
| ATY5392 | MATa Ste6-GFP                                                 | S288C   |         | Invitrogen             |
| ATY5381 | MATa Ste7-GFP                                                 | S288C   |         | Invitrogen             |
| ATY5379 | MATa Ste20-GFP                                                | S288C   |         | Invitrogen             |
| ATY5380 | MATa Ste50-GFP                                                | S288C   |         | Invitrogen             |
| ATY5145 | MATa Wsc2-GFP                                                 | S288C   |         | Invitrogen             |
| ATY5146 | MATa Wsc3-GFP                                                 | S288C   |         | Invitrogen             |
| ATY5150 | MATa Rvs161-GFP                                               | S288C   |         | Invitrogen             |
| ATY5151 | MATa Rvs167-GFP                                               | S288C   |         | Invitrogen             |
| ATY5873 | MATa Sec3-GFP                                                 | S288C   |         | Invitrogen             |
| ATY5301 | MATa Ack1-GFP                                                 | S288C   |         | Invitrogen             |
| ATY5340 | MATa Kel1-GFP                                                 | S288C   |         | Invitrogen             |
| ATY5341 | MATa Kel2-GFP                                                 | S288C   |         | Invitrogen             |
| ATY5307 | MATa Lrg1-GFP                                                 | S288C   |         | Invitrogen             |
| ATY5338 | MATa Msb1-GFP                                                 | S288C   |         | Invitrogen             |
| ATY5345 | MATa Mpk1-GFP                                                 | S288C   |         | Invitrogen             |
| ATY5149 | MATa Pkc1-GFP                                                 | S288C   |         | Invitrogen             |
| ATY5299 | MATa Fps1-GFP                                                 | S288C   |         | Invitrogen             |
| ATY4979 | MATa Far1-GFP                                                 | S288C   |         | Invitrogen             |
| ATY1513 | MAT $\alpha$ Sik1-mRFP                                        | S288C   |         | W-K Huh                |
| ATY4066 | MATa Sik1-mRFP [pNup49-GFP]                                   | S288C   | pAT635  | ATY1513                |
| ATY3328 | MATa YPH499                                                   | YPH     |         | E. Cabib               |
| ATY6125 | MAT $\alpha$ GAL-Axl1-GST Bud4-13Myc                          | YPH     |         | M. Lord, ML627         |
| ATY6179 | MAT $\alpha$ GAL-Axl1-GST Bud4-13Myc                          | YPH     | p1352   | ATY6125                |
| ATY5056 | MATa                                                          | YPH     | p1352   | ATY3328                |

| <b>Table S5. Plasmid List</b> |                        |                      |                      |
|-------------------------------|------------------------|----------------------|----------------------|
| <b>Name</b>                   | <b>Expression Unit</b> | <b>Type</b>          | <b>Source</b>        |
| pAT161                        | GAL-HO                 | URA3/CEN             | I. Herskowitz        |
| pAT635                        | pNup49-GFP             | LEU2/CEN             | V. Doye              |
| pAT1045                       | pFA6a-hphNT1           | N.A.                 | Euroscarf            |
| pAT1125                       | GFP-Cdc3               | URA3/CEN             | E. Bi                |
| pAT1301                       | GFP-Bud8               | URA3/2-micron pRS426 | H-U Moesch, pME1772  |
| pAT1145                       | Cyt-dsRed              | URA3/YiP             | E. Grote, pEG223     |
| pAT1303                       | GFP-Bud9               | URA3/2-micron pRS426 | H-U Moesch, pME1777  |
| pAT1352                       | <i>bud1</i> (arg16)    | YCp50                | H-U Moesch/A. Bender |
| pAT1368                       | CDC3-mCherry           | Yip128/LEU2          | E1914, E. Bi         |
| pAT1380                       | Bni1-3GFP              | Yip/LEU2             | PB1993, D. Pellman   |
